# Supplementary material for: Enzalutamide Enhances PSMA Expression of PSMA-Low Prostate Cancer
Source: MDPI journal article supplement (doi:10.3390/ijms22147431), 2021-07-11
Supplement: s1 [file s1]

# Enzalutamide enhances PSMA expression of PSMA-low prostate cancer – Supplemental Figures

**Magdalena Staniszewska 1, Pedro Fragoso Costa 1, Matthias Eiber 2, Jasmin M. Klose 1, Jasmin Wosniack 1, Hen-ning Reis 3, Tibor Szarvas 4,5, Boris Hadaschik 4, Katharina Lücknerath 1,6, Ken Herrmann 1, Wolfgang P. Fendler 1,\* and Janette Iking 1,\*#**

**1** Department of Nuclear Medicine, University of Duisburg-Essen and German Cancer Consortium (DKTK)-University Hospital Essen, Hufelandstraße 55, D-45147 Essen, Germany;

**2** Department of Nuclear Medicine, Klinikum rechts der Isar, Technical University of Munich, Ismaninger Straße 22, D-81675 Munich, Germany;

**3** Institute of Pathology, University of Duisburg-Essen, University Hospital Essen, Hufelandstraße 55, D-45147 Essen, Germany;

**4** Department of Urology, University of Duisburg-Essen and German Cancer Consortium (DKTK)-University Hospital Essen, Hufelandstraße 55, D-45147 Essen, Germany;

**5** Department of Urology, Semmelweis University, Ulloi ut 78/b, 1082, Budapest, Hungary

**6** Department of Molecular and Medical Pharmacology, David Geffen School of Medicine, University of California Los Angeles, 650 Charles E young Drive S, Los Angeles, CA 90095, USA;

**\*** The authors contributed equally to this study.

**#** Correspondence: [janette.iking@uk-essen.de](mailto:janette.iking@uk-essen.de)

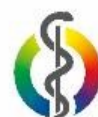

**Universitätsmedizin Essen**

Universitätsklinikum

Klinik für Nuklearmedizin

# Suppl. Fig. 1 $^{68}\text{Ga}$ -PSMA PET/CT before and after enzalutamide.

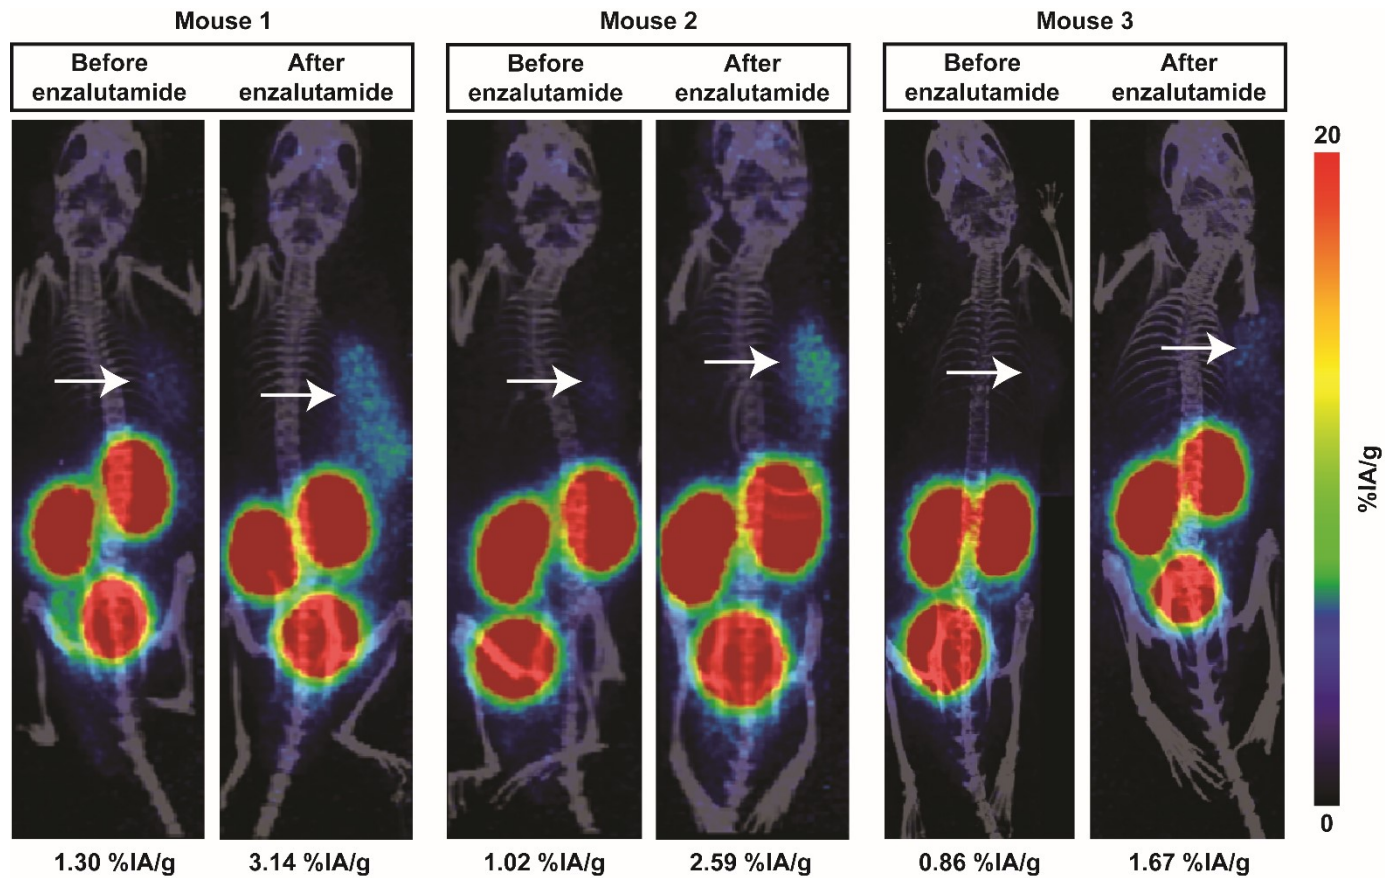

**Fig S1.  $^{68}\text{Ga}$ -PSMA PET/CT before and after enzalutamide.** Representative maximum intensity projections (MIP) of three different mice bearing 22Rv1 tumors (arrow) before (baseline) and after a two-week treatment with enzalutamide are shown (n=9). Average  $^{68}\text{Ga}$ -PSMA tumor uptake is given below the image. **Abbreviations:** %IA/g, % injected activity per gram tissue.

## Suppl. Fig. 2 Empiric partial volume effect (PVE) correction data and methodology.

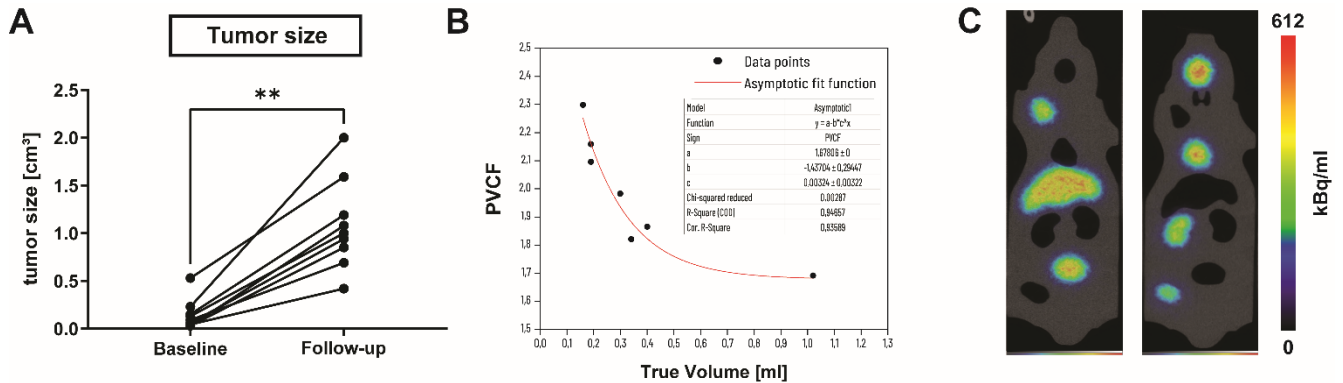

**Fig S2. Empiric partial volume effect (PVE) correction data and methodology.** Since the tumor size at baseline is significantly lower than at follow-up (A), it is appropriate to correct for partial volume effects (PVE). A partial volume correction factor (PVCF) profile was fitted to an asymptotic curve (B) with a dependency on the cavity volume measured in a mouse-like phantom (C). The PVCF was calculated by dividing the calibrated activity concentration by the mean calibrated activity contained in the PET reconstructed images. **Statistics:** Wilcoxon matched-pairs signed rank test. \*\* $p \leq 0.01$ .

## Suppl. Fig 3 Control tissue microarray for immunohistochemistry stainings.

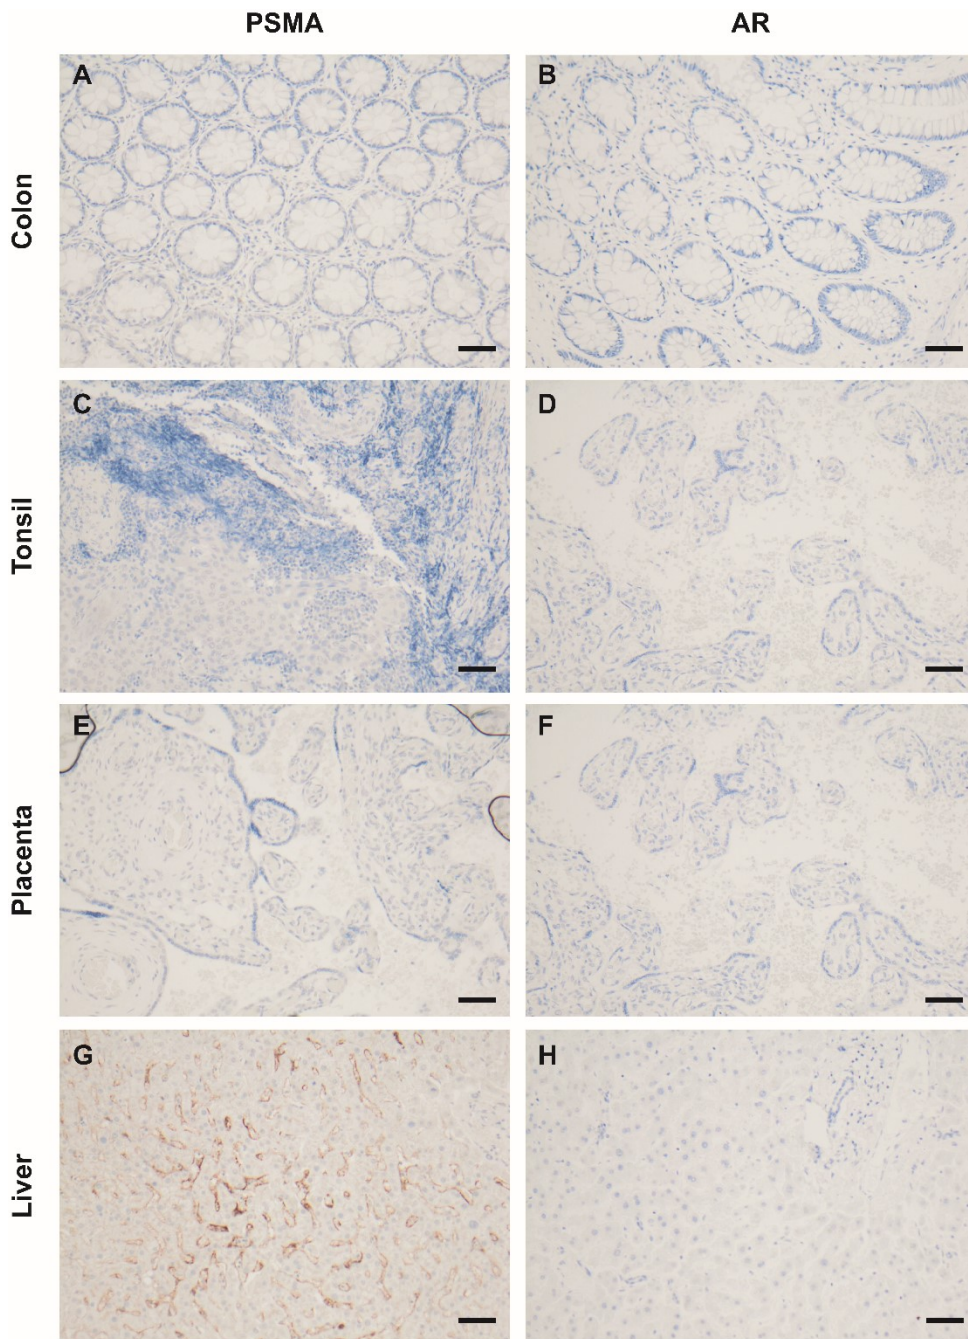

**Fig S3. Control tissue microarray for immunohistochemistry stainings.** Colon, tonsil and placenta serve as negative controls for PSMA and AR. Live tissue is negative for AR and typically positive for PSMA. **Scale:** 50  $\mu$ m.
